# Supplementary material
Source: ML conference proceedings conference paper supplement (https://openreview.net/forum?id=HEjv660F3j)
Supplement: supplementary_material [file attachment]

# CFPNet: Improving Lightweight ToF Depth Completion via Cross-zone Feature Propagation

## Supplementary Material

In this supplementary material, we provide additional visual comparisons. More results comparing our CFPNet and DELTAR [21] are given in Fig. 9 and 10. Furthermore, we offer additional results to demonstrate the superior depth completion performance of our CFPNet and the advantage of our direct-attention-based propagation module (DAPM) over large-kernel-based propagation module (LKPM) when the ToF signal is of resolution  $2 \times 2$  in Fig. 11.

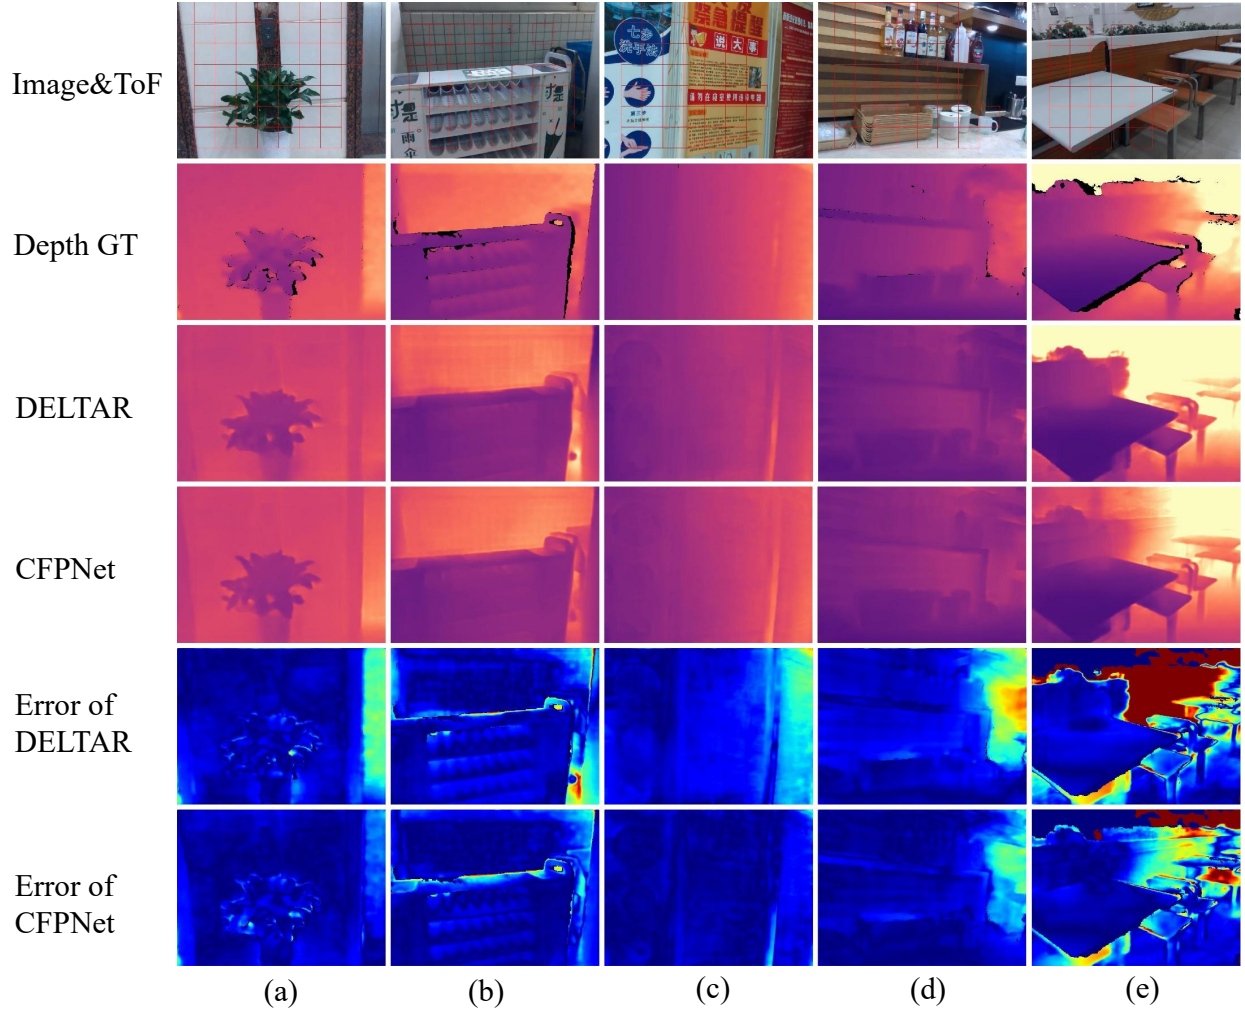

Figure 9. More qualitative comparisons on the ZJU-L5 dataset. Our CFPNet achieve lower errors in outside-zone areas.

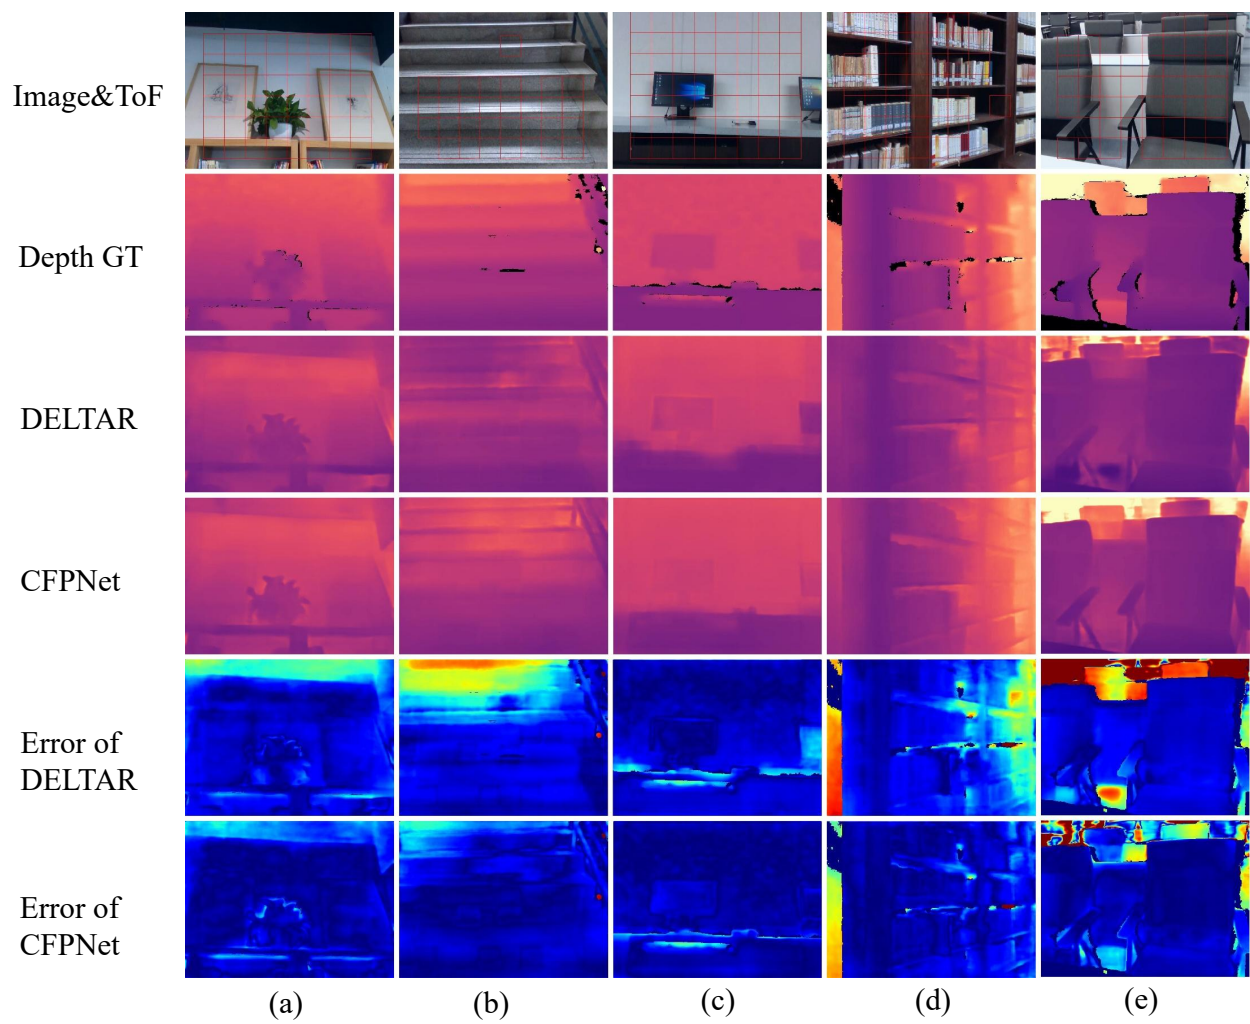

Figure 10. More qualitative comparisons on the ZJU-L5 dataset. Our CFPNet achieve lower errors in outside-zone areas.

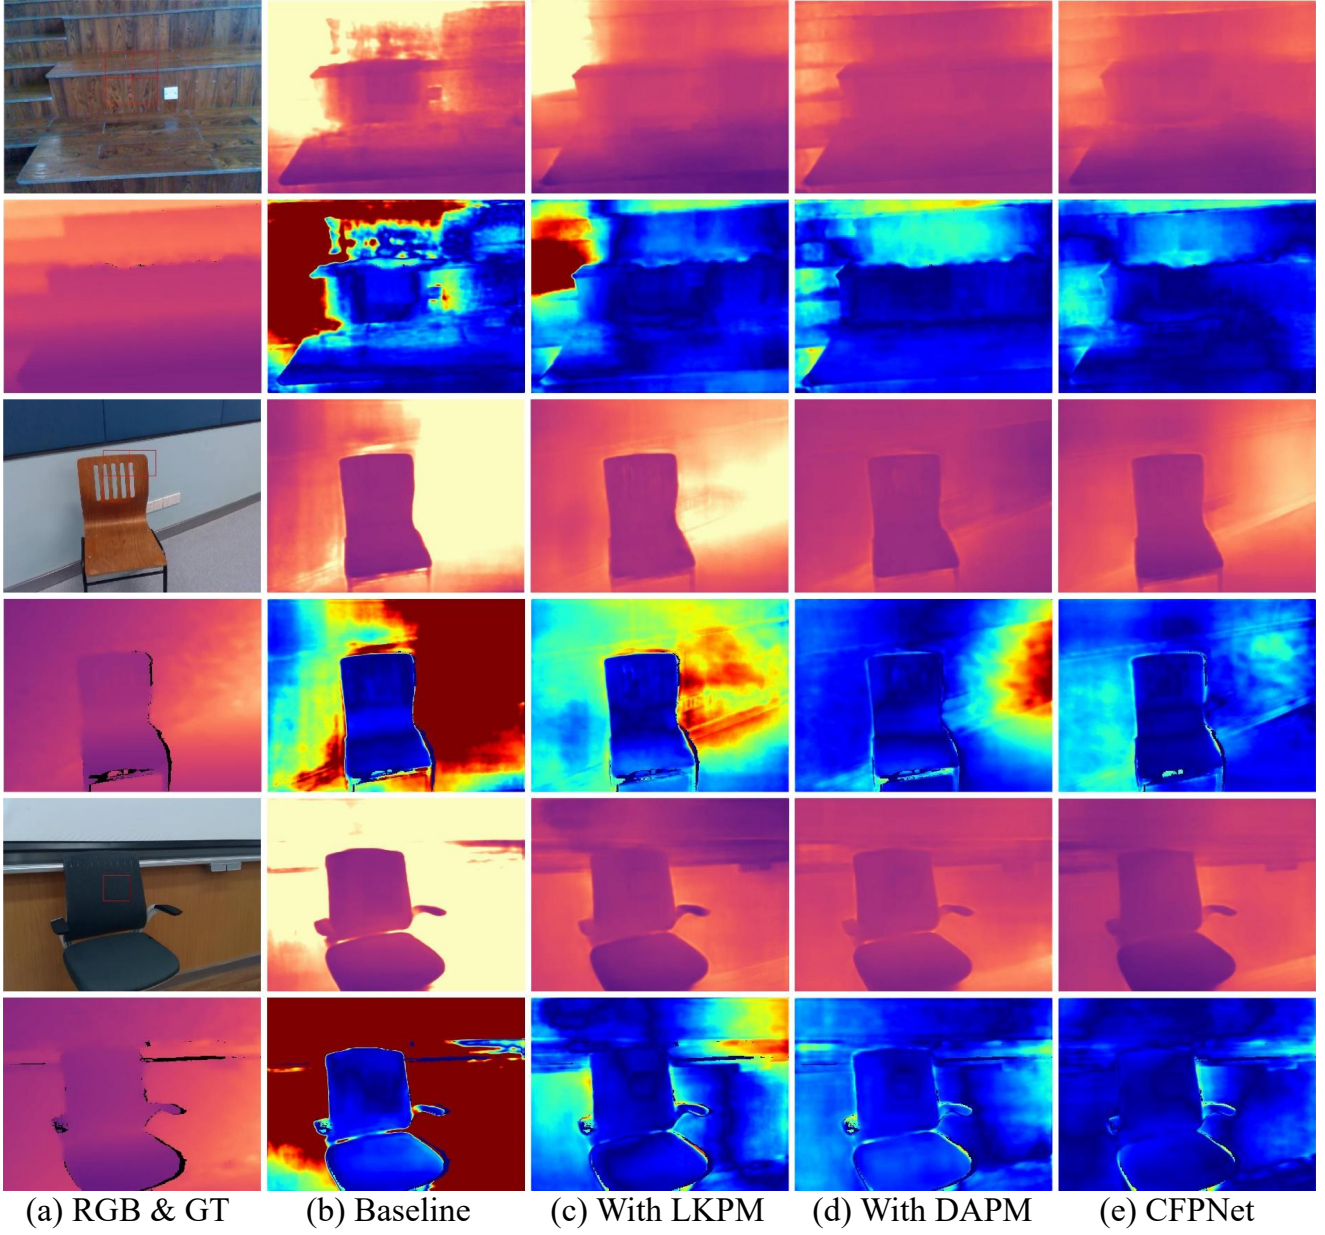

Figure 11. More qualitative comparisons on the ZJU-L5 dataset where we simulate the ToF signal is of resolution  $2 \times 2$ . In this simulated large-FOV-difference case, our CFPNet can obtain superior performance compared with our baseline method [21]. Moreover, the benefits of DAPM are greater than those of LKPM in this scenario.
